# Supplementary material for: SARS-CoV-2 Structural Proteins Modulated Blood-Testis Barrier-Related Proteins through Autophagy in the Primary Sertoli Cells
Source: MDPI journal article supplement (doi:10.3390/v15061272), 2023-05-29
Supplement: s1 [file s1]

## Plasmid: pEGFP-N1, Endonuclease enzyme: EcoRI/BamHI

SARS-CoV-2-E

([https://www.ncbi.nlm.nih.gov/nucleotide/OM273378.1?report=genbank&log\\$=nuclalign&blast\\_rank=1&RID=SAPP56TB013](https://www.ncbi.nlm.nih.gov/nucleotide/OM273378.1?report=genbank&log$=nuclalign&blast_rank=1&RID=SAPP56TB013))

GAATTCGCCACCATGTACAGCTTCGTGAGCGAGGAGACCGGCACACTGATTGTGAACTCCGTGCTGCTCTTCCTGGCCTTCGTGGTGTTCCTGCTCGTGACACTCGCCATTCTGACCGCCCTCAGACTGTGCGCCTACTGCTGCAACATTGTGAACGTGTCCCTGGTGAAGCCATCTTTCTACGTGTACTCCAGAGTGAAGAACCCTAACAGCTCTAGGGTGCCCGACCTCCTGGTGCGGATCC

SARS-CoV-2-M:

([https://www.ncbi.nlm.nih.gov/protein/8CTK\\_A?report=genbank&log\\$=protaalign&blast\\_rank=1&RID=SARPHOF1013](https://www.ncbi.nlm.nih.gov/protein/8CTK_A?report=genbank&log$=protaalign&blast_rank=1&RID=SARPHOF1013))

GAATTCGCCACCATGGCCGACTCTAACGGCACAATTACAGTGAGGAGCTGAAGAAGCTGTTAGAACAGTGGAACCTGGTGATCGGCTTCCTGTTCTGACATGGATTTCCTCCTCCAGTTTCGCTACGCCAACCGGAACAGGTTCTGTACATTATTAAGCTGATTTTCCTGTGGCTCCTCTGGCCCGTGACACTGGCCTGCTTCGTGCTCGCCGCGTGTACCGGATTAACCTGGATCACAGGCGGCATTGCCATTGCGATGGCCTGCCTCGTGGGCCTCATGTGGCTGTCTTACTTCATTGCCTCTTTCAGACGTGTTGCGCCGCACACGGTCTATGTGGTCTTTCAACCCAGAGACAAACATTCTGCTGAACGTGCCCTGCACGGCACCATTCTCACAAGACCACTGCTTGAATCCGAGCTGGTGATCGGCGCCGTGATTCTGAGAGGCCACCTCAGAATTGCCGGCCACACCTGGGCAGATGCGACATCAAGGACCTCCCTAAGGAGATCACAGTGCCACATCTAGGACACTCAGTACTACAAGCTGGGCGCCTCGCAGCGAGTGGCCGGCGACTCCGGCTTCGCCGCTACAGCCGTTACCGCATCGGCAACTACAAGCTCAACACCGACCACTCTTCTAGCAGCGACAACATCGCCCTGCTCGTGACGCGGATCC

SARS-CoV-2-N

([https://www.ncbi.nlm.nih.gov/nucleotide/MZ948831.1?report=genbank&log\\$=nuclalign&blast\\_rank=1&RID=SAPZ4RBG013](https://www.ncbi.nlm.nih.gov/nucleotide/MZ948831.1?report=genbank&log$=nuclalign&blast_rank=1&RID=SAPZ4RBG013))

GAATTCGCCACCATGAGCGACAACGGCCCTCAGAACAGCGGAACGCCCTAGGATTACATTCGGCGGCCCATCTGACTCTACCGGCTCTAACAGAACGGCGAGCGATCCGGCGCCCGGTCCAAGCAGCGGAGACCTCAGGGCCTGCCAAACAACACAGCCTCTTGGTTCACAGCCCTACCCAGCACGGCAAGGAGGACCTGAAGTTCCCTAGAGGCCAGGGCGTGCCAAATTAACAACAACTCTTCTCCTGACGACCAGATTGGCTACTACAGACGCGCCACACGGAGAATCCGGGGCGGCGACGGCAAGATGAAGGACCTGTCTCCTAGGTGGTACTTCTACTACCTGGGACCGGCCCCGAGGCCGCTCCCATACGGCGCCAACAAGGACGGCATTATTTGGGTGGCCACCGAGGGCGCCCTGAACACCCCAAAGGACCACATTGGCACACGGAACCTGCCAAACAACGCCGCCATCGTGCTACAGCTCCCTCAGGGCACCACTGCCTAAGGGCTTCTACGCCGAGGGCTCTCGGGGCGGCTCTCAGGCCCTTTCTAGGTCTAGCTCTCGTTCTCGCAACTCTTCCCGAACTCCACCCCTGGCTCTTCCCGAGGCACATCTCCGTGCCCGCATGGCCGGAACGGCGGCGACGCCCTCGCCCTGCTCTGCTGGACAGACTGAACCAGCTGGAGTCTAAGATGTCTGGCAAGGGCCAGCAGCAGAGGGCCAGACCGTGACAAAGAAGTCCGCCGCCGAGGCCCTAAGAAGCCTAGACAGAAGCGCACAGCCACAAAGGCCTACAACGTGACACAGGCCTTCGGGCGGAGAGGGCCCCGAGCAGACACAGGGCAACTTCGGCGACCAGGAGCTGATTAGACAGGGCACCGACTACAAGCACTGGCCTCAGATTGCCAGTTCGCCCTAGCGCCTCTGCCTTCTTCGGCATGTCTCGCATTGGCATGGAGGTGACCCCCAGCGGGACGTGGCTCACATACACCGGCGCCATTAAGCTGGACGACAAGGACCCAACTTCAAGGACCAGGTGATTCTGCTGAACAAGCACATTGACGCCTACAAGACATTCCCACCTACCGAGCCAAAGAAGGACAAGAAGAAGAAGGCCGACGAGACCCAGGCCCTCCCTCAGAGACAGAAGAAGCAGCAGACCGTGACACTGCTCCCCGCCGCCGACCTCGACGACTTCTCTAAGCAGCTTCAGCAGTCCATGTCTTCTGCCGACTCCACCCAGGCCCGGATCC

SARS-CoV-2-S

:

([https://www.ncbi.nlm.nih.gov/nucleotide/MZ393690.1?report=genbank&log\\$=nuclalign&blast\\_rank=1&RID=SAR32RX7016](https://www.ncbi.nlm.nih.gov/nucleotide/MZ393690.1?report=genbank&log$=nuclalign&blast_rank=1&RID=SAR32RX7016))

GAATTCGCCACCATGTTTCGTGTTCTCGTGCTGCTCCCACTGGTGTCTAGCCAGTGCCTGAACCTCACCACCCGCACCC  
AGCTCCCTCCTGCCTACACAAACAGCTTCACAAGGGGCGTGTAACCTGACAAGGTGTTCCGGTCTAGCGTGCTGCA  
CTCTACACAGGACCTGTTCCCTCCCTTTCTTCTTAACGTGACATGGTTCCACGCCATCCATGTATCCGGCACAACGGC  
ACAAAGCGGTTTCGACAACCCCGTGCTCCCTTTCAACGACGGCGTGTAACCTCGCCAGCACCGAGAAGTCTAACATTATTA  
GAGGCTGGATTTTCGGCACCACACTCGACTCTAAGACCCAGTCTCTCCTGATTGTGAACAACGCCACAACGTGGTGAT  
TAAGGTGTGCGAGTTCCAGTTCTGCAACGACCCTTTCTGGGCGTGTAACCTGACAAGAACAACAGTCTTGATGGAG  
TCCGAGTTCCGGGTGTAACCTGACGCAACAACCTGCACATTGAGTACGTGTCTCAGCCTTTCTCATGGACCTGGAGG  
GCAAGCAGGGCAACTTCAAGAACCTGAGAGAGTTTCGTGTTCAAGAACATTGACGGCTACTTCAAGATTTACTCCAAGCA  
CACCCCAATTAACCTGGTGAGGGACCTCCCTCAGGGCTTCTCCGCCCTGGAACCCCTCGTGACCTCCCAATTGGCATT  
AACATCACCCGGTTCCAGACACTGCTCGCCCTCCACCGGTCTTACCTGACCCAGGCGACTCTCTAGCGGCTGGACAG  
CCGGCGCCGCCCTACTACGTGGGCTACCTCCAGCCACGCACATTCCTCTGAAGTACAACGAGAACGGCACAATTAC  
CGACGCCGTGGACTGCGCCCTCGACCCACTGAGCGAGACAAAGTGCACACTGAAGTCTTTCACAGTGAGAAGGGCATT  
TACCAGACATCTAACTTCCGGGTGCAGCCTACCGAGTCTATTGTGCGGTTCCCAAACATTACCAACCTGTGCCCTTTCTG  
GCGAGGTGTTCAACGCCACCCGCTTCGCCTCTGTGTACGCTGGAACCGGAAGCGGATTTCTAACTGCGTGCGCGACTA  
CTCTGTGCTGTACAACAGCGCCTCTTTCTCCACATTCAAGTGCTACGGCGTGTCCTTACAAAGCTGAACGACCTGTGC  
TTCACAAACGTGTACGCCGACTCTTTCGTGATCCGGGGCGACGAGGTGAGGCAGATTGCCCCAGGCCAGACAGGCAAGA  
TTGCCGACTACAACCTACAAGCTCCCTGACGACTTCACAGGCTGCGTGATCGCCTGGAACCTCTAACACCTCGACTCTAA  
GGTGGGCGGCAACTACAACCTACCTGTACAGACTGTTCCGCAAGTCTAACCTGAAGCCTTTTCGAGCGGGACATTAGCACC  
GAGATTTACCAGCGCGGCAGCACCCCATGCAACGGCGTGAGGGCTTCAACTGCTACTTCCCACTCCAGTCTTACGGCT  
TCCAGCCTACAAACGGCGTGCGCTACAGCCATACCGGTGGTGGTGCTGTCTTTGAATTGCTCCACGCCCCCGCCAC  
AGTGTGCGGCCCTAAGAAGTCCACAAACCTGGTGAAGAACAAGTGCCTGAACCTTCAACTTCAACGGCCTCACAGGCACA  
GGCGTGCTCACCGAGTCCAACAAGAAGTTCTGCCTTTCCAGCAGTTTGCCCGGACATTGCCGACACCACCGACGCCG  
TGAGGGACCTCAGACATTGGAGATTCTGGACATCACCCCATGCAGCTTCGGCGGCGTGCTGTGTATCACCCCGGCAC  
CAACACATCTAACAGGTGGCCGTGCTGTACAGGACGTGAACCTGCACAGAGGTGCCAGTGGCCATCCACGCCGACCAG  
CTGACCCCTACATGGAGGTGTAACCTCTACAGGCTCTAAGTGTTCAGACTCGCGCCGGCTGCCTGATTGGCGCCGAGC  
ACGTAAACAACAGCTACGAGTGCGACATCCCAATTGGCGCCGGCATTGCGCCTCTTACCAGACCCAGACAACTCTCC  
TAGACGGGCCCCGTGTGTGGCCTCTCAGTCTATTATTGCCTACACCATGTCCCTGGGCGCCGAGAAGTCTGTGGCCTAC  
TCTAACAACTCTATTGCCATCCCTACAACTTCACAATTTCTGTGACCACCGAGATTCTCCAGTGTCTATGACAAAGA  
CATCCGTGGACTGCACCATGTACATTTGCGGCGACTCTACCGAGTGCTCTAACCTCCTGCTCCAGTACGGCTCTTTCTG  
CACCCAGCTCAACCGGGCCCTCACAGGCATTGCCGTGGAGCAGGACAAGAACACACAGGAGGTGTTCCGCCAGGTGAAG  
CAGATTTACAAGACCCCTCCTATTAAGGACTTCGGCGGCTTCAACTTCTCTCAGATTCTCCCCGACCCTAGCAAGCCAT  
CTAAGCGGTCCTTCATTGAGGACCTGCTGTTCAACAAGGTGACACTGGCCGACGCCGGCTTCATTAAGCAGTACGGCGA  
CTGCCTGGGCGACATCGCCGCTCGTGACCTGATTTGCGCCAGAAGTTCAACGGCCTGACAGTGCTCCCCCACTGCTC  
ACCGACGAGATGATTGCCAGTACACGAGCGCCCTCCTCGCCGGCACCATCACATCTGGCTGGACCTTCGGCGCCGGCG  
CCGCCCTACAGATCCCTTTCCGCATGCAGATGGCCTACCGCTTCAACGGCATCGGCGTGACCCAGAACGTGCTGTACGA  
GAACCAGAAGCTCATCGCCAACAGTTCAACTCTGCCATTGGCAAGATTCAGGACTCTCTGTCTAGCACAGCCAGCGCC  
CTGGGCAAACTGCAAGACGTGGTGAACCAGAACGCCAGGCCCTCAACACACTGGTGAAGCAACTCTCGTCTAACTTCG  
GCGCCATTAGCTCTGTGCTGAACGACATTCTGTCCGACTCGACAAGGTGGAGGCCGAGGTGCAGATTGACAGACTGAT  
TACAGGCAGACTCCAATCTCTACAGACATACGTGACACAGCAGCTCATTAGAGCCGCCGAGATCAGAGCCTCCGCCAAC  
CTGGCCGCCACAAGATGAGCGAGTGCGTGCTGGGCCAGTCCAAGAGAGTGAGCTTCTGCGGCAAGGGCTACCACCTCA  
TGTCTTTCCCTCAGTCCGCCCTCACGGCGTGGTGTTCCTCCATGTTACATACGTGCCAGCCAGGAGAAGAAGTTCAC

CACAGCCCCGCCATTTGCCACGACGGCAAGGCCCACTTCCCTAGAGAGGGCGTGTTTCGTGTCCAACGGCACCCTGG  
TTCGTGACCCAGAGAACTTCTACGAGCCTCAGATTATCACCACCGACAACACCTTCGTGTCTGGCAACTGCGACGTGG  
TGATTGGCATTGTGAACAACACAGTGTACGACCCATTGCAACCCGAACCTTGACTCTTTCAAGGAGGAACCTGACAAGTA  
CTTCAAGAACCACACATCTCCCGACGTGGACCTGGGCGACATTAGCGGCATTAACGCCTCTGTGGTGAACATTGAGAAG  
GAGATCGACAGGCTGAACGAGGTGGCCAAGAACCTGAACGAGTCTCTGATTGACTTGCAAGAGCTGGGCAAGTACGAGC  
AGTACATTAAGTGGCCTTGGTACATTTGGCTGGGCTTCATCGCCGGCCTGATCGCCATTGTGATGGTGACCATCATGCT  
GTGCTGCATGACATCTTGCTGCTCTTGCCTGAAGGGCTGCTGCTCTTGCGGCTCTTGCTGCAAGTTCGACGAGGACGAC  
TCTGAGCCCGTGCTGAAGGGCGTGAAGCTCCACTACACA

CGGGATCC
